# Supplementary material for: Development and Characterization of an In Vitro Round Window Membrane Model for Drug Permeability Evaluations
Source: MDPI journal article supplement (doi:10.3390/ph15091105), 2022-09-05
Supplement: s1 [file s1]

## **Supplemental Information**

### **Development and Characterization of an In Vitro Round Window Membrane Model for Drug Permeability Evaluations**

Ruby Singh<sup>1,2</sup>, Bhaskar Birru<sup>1,2</sup>, Joachim G.S. Veit<sup>1,2</sup>, Elizabeth M. Arrigali<sup>1,2</sup>, Monica A. Serban<sup>1,2</sup>

<sup>1</sup> Department of Biomedical and Pharmaceutical Sciences, University of Montana, Missoula, MT 59812, USA

<sup>2</sup> Montana Biotechnology Center (BIOTECH), University of Montana, Missoula, MT 59812, USA

**Table S1.** Table for the pertinent physiochemical properties of model pharmaceuticals used in the manuscript

| Drug                           | Molecular weight<br>(g/mol) | Chemical Formula                                                   | log P |
|--------------------------------|-----------------------------|--------------------------------------------------------------------|-------|
| Fluorescein                    | 332.3                       | C <sub>20</sub> H <sub>12</sub> O <sub>5</sub>                     | 3.88  |
| Dexamethasone Sodium Phosphate | 516.405                     | C <sub>22</sub> H <sub>30</sub> FO <sub>8</sub> P                  | 1.56  |
| Ciprofloxacin HCl              | 367.8                       | C <sub>17</sub> H <sub>21</sub> ClFN <sub>3</sub> O <sub>4</sub>   | -0.86 |
| Gentamicin sulfate             | 1488.8                      | C <sub>60</sub> H <sub>125</sub> N <sub>15</sub> O <sub>25</sub> S | -3.1  |

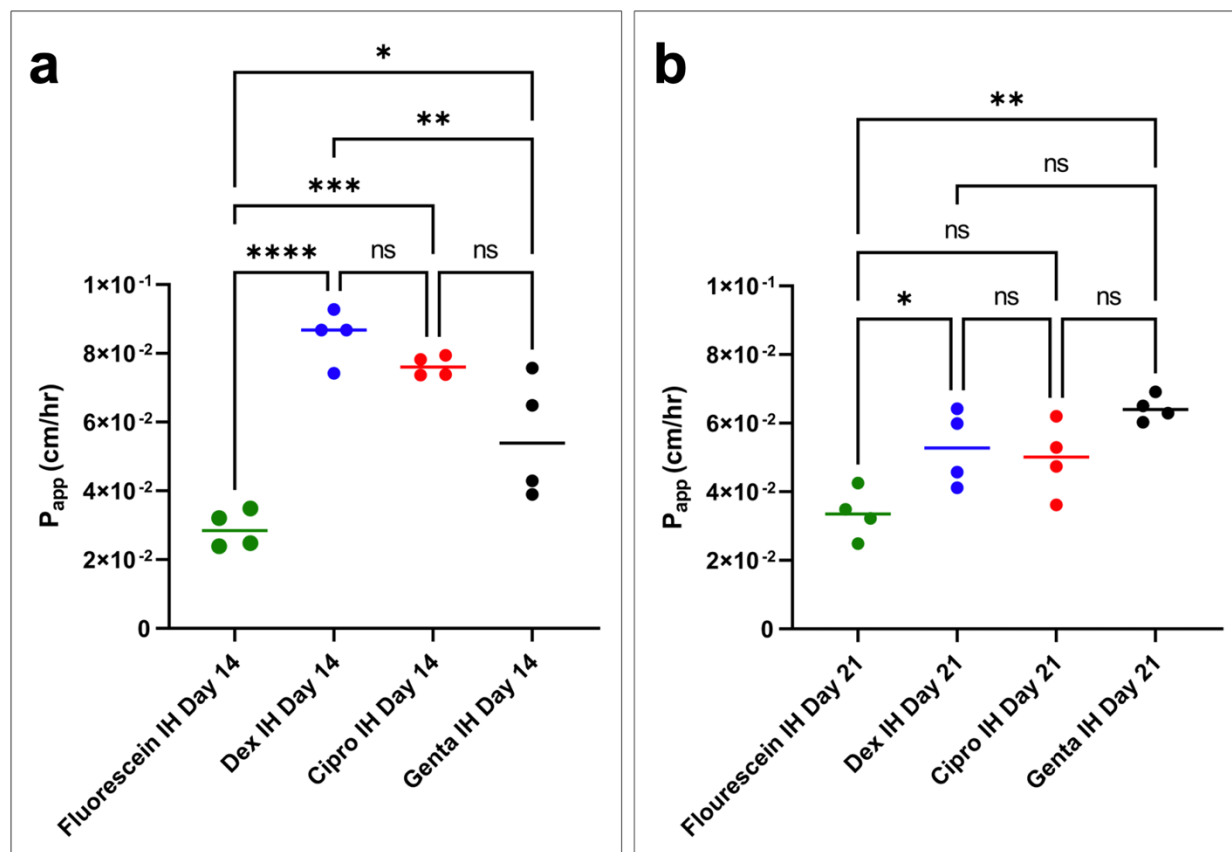

**Figure S1. Tissue growth time effect on RWM model drug permeation.** Drug flux of profile for fluorescein, DSP, ciprofloxacin HCl, and gentamicin sulfate in (a) day 14; and (b) day 21 AETs. n = 4. One-way ANOVA with Tukey's correction for multiple comparisons; where \*\*\*p<0.001, \*\*\*\*p<0.0001, \*\*p<0.01, \*p<0.05 as value of significance.

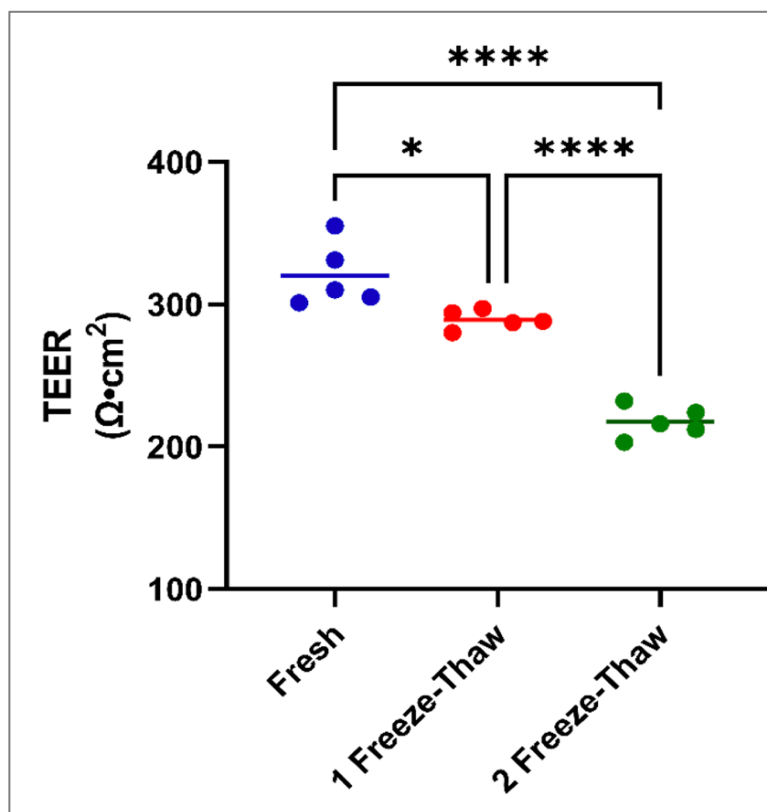

**Figure S2. Tissue freeze/thawing has a significant effect AET TEER.** Effect of freeze/thaw processing cycles on tissue TEER values (n = 5), One-way ANOVA with Tukey's correction for multiple comparisons, where \* \*\*\*p<0.0001, \*p<0.01 as value of significance.
